# Supplementary material for: Targeted next-generation sequencing for pulmonary infection diagnosis in patients unsuitable for bronchoalveolar lavage
Source: Frontiers journal article supplement (doi:10.3389/fmed.2023.1321515), 2023-12-21
Supplement: Presentation_1.PDF [file Presentation_1.PDF]

## Supplementary File. Methods of CMTs

### 1. Microbial culture

Sputum samples were cultured on blood agar, chocolate agar, and eosin methylene blue agar at 35°C. Sabouraud dextrose agar without chloramphenicol incubated at 35°C was used to isolate fungi. Bacteria were identified by the Vitek2 automated system (BioMérieux, Marcy-l'Etoile, France).

### 2. Real-time PCR

The artus CMV PCR Kit (4500003, Qiagen, Shanghai, China), artus EBV PCR Kit (4501363, Qiagen, Shanghai, China), and artus HSV-1/2 PCR Kit (4500363, Qiagen, Shanghai, China) for amplification and quantitation were performed in the ABI 7500 Fast and 7500 Real-Time PCR Systems (Thermo Scientific, Massachusetts, USA) according to the manufacturers' instructions.

### 3. Serologic testing

The indirect immunofluorescent assay (IFA) PNEUMOSLIDE IgM Kit (Vircell, S.L., Granada, Spain) to simultaneously test antibodies against the main ethiological agents causing respiratory tract infectious: *Legionella pneumophila* sg 1, *Mycoplasma pneumoniae*, *Coxiella burnetii*, *Chlamydophila pneumoniae*, adenovirus, respiratory syncytial virus, influenza A, influenza B and parainfluenza 1, 2 and 3.

(1-3)- $\beta$ -D-Glucan Assay Kit (DNK-1401-1, Dynamiker Biotechnology, Tianjin, China) and Galactomannan Assay Kit (DNK-1402-2, Dynamiker Biotechnology, Tianjin, China) were used for fungal and *aspergillus* detection.
