# Supplementary material for: Targeted next-generation sequencing for pulmonary infection diagnosis in patients unsuitable for bronchoalveolar lavage
Source: Front Med (Lausanne). 2023 Dec 21;10:1321515. doi: 10.3389/fmed.2023.1321515 (PMC10764475; doi:10.3389/fmed.2023.1321515)
Supplement: Supplementary file 2 [file Table_2.XLSX]

## Sheet: Sheet1
Supplementary Table S2. Pathogens identified by tNGS and CMTs.
Patient ID	Age, year	Gender	Comorbidity	Antibiotic exposure	Pathogens identified by tNGS (normalized read, amplicon coverage)	Pathogens identified by CMTs
P001	47	Male	Yes	Yes	Negative	Negative
P002	69	Male	Yes	Yes	Candida albicans (1351, 100%), Moraxella catarrhalis (781, 100%), Staphylococcus aureus (350, 100%)	Candida albicans
P003	74	Female	Yes	No	Haemophilus influenzae (53097, 100%)	Haemophilus influenzae
P004	77	Female	Yes	Yes	Negative	Negative
P005	5	Male	Yes	Yes	Pneumocystis jirovecii (5458, 100%), Epstein-Barr virus (4328, 100%), Acinetobacter baumannii (118, 100%), Human herpesvirus 7 (52, 100%), Human herpesvirus 6 (6, 100%)	Negative
P006	82	Male	Yes	No	Candida albicans (33688, 100%)	Candida albicans
P007	68	Male	Yes	Yes	Streptococcus pyogenes (149, 100%), Haemophilus influenzae (17, 60%)	Negative
P008	44	Male	Yes	Yes	Klebsiella pneumoniae (31972, 100%), Acinetobacter baumannii (24073, 100%), Enterococcus faecalis (15519, 100%), Klebsiella aerogenes (2628, 100%), Enterobacter cloacae (518, 50%), Aspergillus fumigatus (80, 100%), Epstein-Barr virus (80, 100%), Candida albicans (76, 100%), Cytomegalovirus (3,66.7%)	Klebsiella pneumoniae
P009	58	Male	Yes	Yes	Negative	Negative
P010	5	Male	Yes	Yes	Rhinovirus (10526, 66.7%), Acinetobacter baumannii (54, 66.7%), Cytomegalovirus (29, 66.7%), Human herpesvirus 6 (3, 100%)	Negative
P011	56	Female	Yes	Yes	Candida albicans (57, 100%), Staphylococcus aureus (52, 100%), Acinetobacter baumannii (39, 66.7%), Cytomegalovirus (19, 100%)	Acinetobacter baumannii, Burkholderia cepacia
P012	75	Male	Yes	Yes	Acinetobacter baumannii (7169, 66.7%), Mycobacteroides abscessus (1108,80%), Staphylococcus aureus (270, 50%), Stenotrophomonas maltophilia (93, 50%), Tropheryma whipplei (16, 100%), Epstein-Barr virus (4, 100%), Human herpesvirus 7 (3, 100%)	Negative
P013	71	Male	Yes	Yes	Staphylococcus aureus (1069, 50%), Candida albicans (351, 100%), Epstein-Barr virus (21, 100%)	Staphylococcus aureus
P014	77	Male	Yes	Yes	Herpes simplex virus 1 (11326, 100%), Human herpesvirus 7 (149, 100%), Acinetobacter baumannii (44, 100%), Epstein-Barr virus (14, 100%)	Elizabethobacteria meningosepticum
P015	69	Male	Yes	Yes	Haemophilus influenzae (7519, 100%), Candida albicans (54, 100%), Human herpesvirus 7 (54, 100%), Epstein-Barr virus (5, 100%)	Acinetobacter baumannii
P016	49	Male	Yes	Yes	Pseudomonas aeruginosa (3565, 100%)	Pseudomonas aeruginosa
P017	89	Male	Yes	Yes	Candida albicans (1333, 100%), Epstein-Barr virus (593, 100%)	Candida (smear microscopy)
P018	45	Female	Yes	Yes	Haemophilus influenzae (22247, 100%), Influenza A virus (7871, 20%), Epstein-Barr virus (3, 100%)	Influenza A virus
P019	97	Male	Yes	Yes	Klebsiella pneumoniae (49618, 100%), Candida albicans (2310, 100%), Acinetobacter baumannii (20, 100%), Cytomegalovirus (11, 66.7%)	Klebsiella pneumoniae
P020	58	Male	Yes	Yes	Influenza A virus (10402, 100%), Herpes simplex virus 1 (2815, 100%)	Influenza A virus
P021	76	Male	Yes	Yes	Haemophilus influenzae (4715, 60%), Human herpesvirus 7 (45, 100%)	Negative
P022	82	Female	Yes	Yes	Pseudomonas aeruginosa (34745, 100%), Escherichia coli (2550, 100%), Stenotrophomonas maltophilia (1588, 100%), Acinetobacter baumannii (1572, 66.7%), Herpes simplex virus 1 (155, 100%), Klebsiella pneumoniae (124, 100%), Epstein-Barr virus (33, 100%), Human herpesvirus 7 (3, 100%)	Negative
P023	68	Male	Yes	Yes	Pneumocystis jirovecii (2062, 100%), Cytomegalovirus (6, 100%)	Negative
P024	6	Female	Yes	Yes	Negative	Negative
P025	76	Male	Yes	Yes	Klebsiella pneumoniae (4399, 100%), Candida albicans (70, 100%), Cytomegalovirus (17, 66.7%), Escherichia coli (10, 100%), Epstein-Barr virus (3, 50%)	Klebsiella pneumoniae, Candida albicans, Escherichia coli
P026	3	Female	No	Yes	Haemophilus haemolyticus (2438, 100%), Rhinovirus (405, 33.3%), Cytomegalovirus (18, 100%)	Acinetobacter baumannii
P027	12	Female	No	Yes	Enterovirus (20523, 100%), Acinetobacter baumannii (411, 100%), Streptococcus pneumoniae (377, 100%), Staphylococcus aureus (108, 100%), Human herpesvirus 7 (18, 100%), Candida albicans (10, 100%)	Negative
P028	3	Male	No	Yes	Human metapneumovirus (29306, 100%), Cytomegalovirus (523, 100%), Human herpesvirus 7 (17, 100%), Human herpesvirus 6 (13, 100%)	Negative
P029	15	Male	Yes	Yes	Pneumocystis jirovecii (32332, 100%), Rhinovirus (29531, 100%), Epstein-Barr virus (988, 100%), Cytomegalovirus (800, 100%), Tropheryma whipplei (112, 100%), Human herpesvirus 7 (15, 100%)	Staphylococcus epidermidis
P030	< 1	Female	No	No	Staphylococcus aureus (20221, 100%)	Staphylococcus aureus
P031	20	Male	Yes	Yes	Human respiratory syncytial virus (39607, 100%), Epstein-Barr virus (40, 100%), Escherichia coli (185, 100%)	Escherichia coli, Human respiratory syncytial virus
P032	63	Male	Yes	Yes	Herpes simplex virus 1 (20774, 100%), Epstein-Barr virus (82, 100%), Enterococcus faecium (16854, 100%), Aspergillus fumigatus (109, 100%), Candida albicans (45, 100%)	Negative
P033	< 1	Male	No	Yes	Escherichia coli (3508, 100%), Enterococcus faecalis (9627, 100%), Ureaplasma parvum (13, 66.7%), Pneumocystis jirovecii (98, 100%), Staphylococcus aureus (1808, 50%)	Escherichia coli
P034	< 1	Male	No	Yes	Human parainfluenza virus (15855, 100%), Escherichia coli (14, 50%), Klebsiella pneumoniae (13, 100%), Acinetobacter baumannii (739, 100%), Rhinovirus (1271,66.7%)	Enterobacter cloacae, Human parainfluenza virus
P035	< 1	Female	Yes	No	Cytomegalovirus (5410, 100%), Haemophilus haemolyticus (37, 66.7%), Staphylococcus aureus (4379, 100%), Measles morbillivirus (27, 66.7%)	Cytomegalovirus
P036	< 1	Male	Yes	No	Human parainfluenza virus (48068, 100%), Cytomegalovirus (2871, 100%), Haemophilus influenzae (3061, 80%), Enterovirus (24, 50%), Klebsiella pneumoniae (22, 100%), Streptococcus pneumoniae (1494, 100%)	Klebsiella pneumoniae
P037	1	Female	No	Yes	Human metapneumovirus (13575, 100%), Human herpesvirus 6 (8, 100%), Tropheryma whipplei (45, 100%), Haemophilus influenzae (24853, 80%), Candida albicans (194, 100%), Staphylococcus aureus (283, 50%), Acinetobacter baumannii (236, 100%)	Negative
P038	6	Male	Yes	Yes	Human herpesvirus 7 (35, 100%), Human mastadenovirus (2744, 100%), Haemophilus influenzae (2900, 80%), Enterovirus (19207, 100%)	Negative
P039	42	Male	Yes	Yes	Human herpesvirus 7 (163, 100%), Mycobacterium tuberculosis complex (41, 57.1%)	Negative
P040	6	Female	No	No	Epstein-Barr virus (9, 100%), Human herpesvirus 7 (7, 100%), Haemophilus haemolyticus (151, 100%), Candida albicans (10, 100%), Staphylococcus aureus (20419, 100%), Rhinovirus (7382, 100%)	Negative
P041	1	Male	Yes	Yes	Epstein-Barr virus (58, 100%), Human herpesvirus 6 (7, 100%), Human mastadenovirus (31316, 100%), Haemophilus influenzae (21952, 80%)	Negative
P042	84	Male	Yes	Yes	Herpes simplex virus 1 (9, 100%), Acinetobacter baumannii (84336, 100%)	Negative
P043	1	Female	No	Yes	Human herpesvirus 7 (7, 100%), Moraxella catarrhalis (24, 100%), Haemophilus haemolyticus (76, 100%), Streptococcus pneumoniae (1557, 100%), Rhinovirus (63732, 100%)	Negative
P044	2	Male	Yes	Yes	Herpes simplex virus 1 (14837, 100%), Epstein-Barr virus (428, 100%), Cytomegalovirus (11, 66.7%), Human herpesvirus 7 (3, 100%), Streptococcus pyogenes (4142, 100%), Candida albicans (40, 100%), Acinetobacter baumannii (67, 100%)	Mycoplasma pneumoniae, Herpes simplex virus 1, Epstein-Barr virus
P045	52	Female	Yes	Yes	Negative	Candida albicans
P046	8	Female	Yes	Yes	Human herpesvirus 7 (20, 100%), Streptococcus pneumoniae (377, 100%), Rhinovirus (67857, 100%)	Negative
P047	4	Male	No	Yes	Human herpesvirus 6 (5, 100%), Moraxella catarrhalis (5711, 100%), Haemophilus influenzae (2698, 80%), Candida albicans (12, 100%), Ureaplasma parvum (13, 66.7%), Mycoplasma pneumoniae (13024, 100%), Streptococcus pneumoniae (16204, 100%), Rhinovirus (23258, 100%)	Negative
P048	6	Female	No	Yes	Epstein-Barr virus (28, 100%), Cytomegalovirus (35, 100%), Human herpesvirus 6 (4, 100%), Human herpesvirus 7 (162, 100%), Candida albicans (105, 100%), Enterovirus (102, 100%), Streptococcus pneumoniae (3094, 100%)	Negative
P049	4	Female	Yes	Yes	Human herpesvirus 7 (17, 100%), Haemophilus influenzae (2644, 80%)	Negative
P050	2	Female	Yes	Yes	Mycoplasma pneumoniae (67037, 100%)	Mycoplasma pneumoniae
P051	3	Male	No	Yes	Human herpesvirus 6 (8, 100%), Human herpesvirus 7 (15, 100%), Haemophilus influenzae (1965, 100%), Haemophilus haemolyticus (4199, 100%), EnterovirusA组 (14134, 100%), Streptococcus pneumoniae (9922, 100%), Staphylococcus aureus (122, 50%), Rhinovirus (3477, 100%)	Negative
P052	6	Female	No	Yes	Human herpesvirus 7 (35, 100%), Tropheryma whipplei (7948, 100%), Aspergillus fumigatus (901, 100%), Rhinovirus (11763, 33.3%)	Aspergillus fumigatus
P053	10	Female	Yes	Yes	Haemophilus haemolyticus (20, 100%), Candida albicans (17, 100%), Mycoplasma pneumoniae (58126, 100%), Streptococcus pneumoniae (803, 100%), Staphylococcus aureus (11, 100%)	Negative
P054	2	Male	No	Yes	Human respiratory syncytial virus (29386, 100%), Cytomegalovirus (7, 100%), Moraxella catarrhalis (515, 100%), Haemophilus influenzae (186, 80%), Streptococcus pneumoniae (17136, 100%)	Negative
P055	6	Male	Yes	No	Human herpesvirus 7 (4, 100%), Candida albicans (8, 100%), Staphylococcus aureus (15, 50%), Rhinovirus (40200, 100%)	Negative
P056	< 1	Female	Yes	Yes	Escherichia coli (171, 100%), Klebsiella pneumoniae (9303, 100%), Enterobacter cloacae (121, 50%), Rhinovirus (31759, 100%)	Negative
P057	< 1	Female	Yes	Yes	Human coronavirusNL63 (13603, 100%), Cytomegalovirus (41003, 100%), Moraxella catarrhalis (485, 100%), Candida albicans (1003, 100%), Pneumocystis jirovecii (24, 100%)	Negative
P058	< 1	Female	No	Yes	Cytomegalovirus (15514, 100%), Streptococcus pneumoniae (28921, 100%), Staphylococcus aureus (14090, 100%), Rhinovirus (20448, 100%)	Negative
P059	33	Male	Yes	Yes	Human coronavirusNL63 (8063, 100%), Cytomegalovirus (5, 100%), Mycobacterium tuberculosis complex (51016, 100%)	Mycobacteria(smear microscopy)
P060	2	Male	No	Yes	Human respiratory syncytial virus (36137, 100%), Candida albicans (447, 100%), Rhinovirus (87, 100%), Staphylococcus aureus (42, 100%), Haemophilus haemolyticus (18, 100%), Human herpesvirus 7 (5, 100%)	Negative
P061	3	Male	No	Yes	Human parainfluenza virus (17318, 100%), Streptococcus pneumoniae (16547, 100%), Rhinovirus (7067, 100%), Staphylococcus aureus (75, 100%), Human herpesvirus 7 (11, 100%), Human herpesvirus 6 (3, 100%)	Negative
P062	80	Male	Yes	Yes	Streptococcus pneumoniae (18689, 100%)	Negative
P063	60	Female	Yes	Yes	Herpes simplex virus 1 (17999, 100%), Klebsiella pneumoniae (1732, 100%), Stenotrophomonas maltophilia (1445, 100%)	Candida tropicalis, Acinetobacter baumannii, Stenotrophomonas maltophilia
P064	58	Female	Yes	Yes	Pseudomonas aeruginosa (3956, 100%), Acinetobacter baumannii (560, 100%), Cytomegalovirus (64, 100%), Escherichia coli (47, 100%)	Pseudomonas aeruginosa, Acinetobacter baumannii
P065	< 1	Male	Yes	No	Rhinovirus (42805, 100%), Haemophilus haemolyticus (1892, 100%), Klebsiella pneumoniae (52, 80%)	Negative
P066	51	Male	Yes	Yes	Escherichia coli (57, 100%)	Escherichia coli
P067	3	Male	Yes	Yes	Human metapneumovirus (22973, 100%), Streptococcus pneumoniae (6478, 100%), Staphylococcus aureus (54, 50%), Haemophilus haemolyticus (11, 100%), Human herpesvirus 6 (7, 100%)	Negative
P068	2	Male	No	No	Rhinovirus (27002, 100%), Enterovirus (402, 100%), Staphylococcus aureus (230, 50%), Human herpesvirus 6 (114, 100%), Haemophilus haemolyticus (93, 100%)	Negative
P069	< 1	Male	Yes	Yes	Klebsiella pneumoniae (36095, 100%), Haemophilus haemolyticus (45, 100%), Pneumocystis jirovecii (36, 100%), Klebsiella aerogenes (35, 100%)	Klebsiella pneumoniae
P070	54	Male	Yes	Yes	Candida albicans (35, 100%), Klebsiella pneumoniae (34, 60%)	Klebsiella pneumoniae, Candida albicans
P071	3	Male	Yes	Yes	Rhinovirus (18705, 33.3%), Streptococcus pneumoniae (6719, 100%), Haemophilus influenzae (229, 100%), Herpes simplex virus 1 (25, 100%), Human mastadenovirus (24, 50%)	Streptococcus pneumoniae, Herpes simplex virus 1
P072	3	Female	No	Yes	Human parainfluenza virus (28866, 100%), Streptococcus pneumoniae (13822, 100%), Rhinovirus (2613, 100%), Moraxella catarrhalis (69, 100%), Haemophilus influenzae (40, 100%)	Streptococcus pneumoniae, Mycoplasma pneumoniae
P073	3	Male	No	Yes	Mycoplasma pneumoniae (45809, 100%), Streptococcus pneumoniae (11537, 100%), Haemophilus haemolyticus (27, 100%), Human herpesvirus 6 (4, 100%)	Mycoplasma pneumoniae
P074	2	Male	No	No	Rhinovirus (60146, 100%), Haemophilus haemolyticus (435, 100%)	Mycoplasma pneumoniae
P075	56	Male	Yes	Yes	Enterococcus faecalis (54015, 100%), Pseudomonas aeruginosa (19781, 100%), Haemophilus influenzae (274, 100%), Escherichia coli (24, 100%), Klebsiella pneumoniae (23, 100%), Herpes simplex virus 1 (6, 100%), Human herpesvirus 7 (5, 100%)	Negative
P076	4	Male	Yes	Yes	Human parainfluenza virus (13357, 100%)	Human parainfluenza virus
P077	< 1	Female	No	Yes	Cytomegalovirus (40458, 100%), Rhinovirus (2292, 100%), Haemophilus haemolyticus (317, 100%), Moraxella catarrhalis (218, 100%)	Negative
P078	< 1	Male	No	No	Acinetobacter baumannii (4042, 100%), Haemophilus haemolyticus (87, 100%), Klebsiella pneumoniae (85, 100%), Cytomegalovirus (3, 66.7%)	Candida albicans
P079	4	Male	Yes	No	Human mastadenovirus (23475, 100%), Haemophilus influenzae (17293, 100%), Rhinovirus (5034, 100%), Streptococcus pneumoniae (684, 100%), Moraxella catarrhalis (526, 100%), Staphylococcus aureus (117, 50%), Epstein-Barr virus (106, 100%)	Negative
P080	4	Male	Yes	Yes	Acinetobacter baumannii (10940, 100%), Staphylococcus aureus (1322, 50%), Human herpesvirus 7 (109, 100%), Streptococcus pneumoniae (68, 83.3%), Human herpesvirus 6 (9, 100%)	Acinetobacter baumannii
P081	22	Male	Yes	Yes	Mycobacterium tuberculosis complex (65552, 100%)	Mycobacteria(smear microscopy)
P082	2	Male	Yes	No	Rhinovirus (42685, 100%), Haemophilus influenzae (1039, 100%), Haemophilus haemolyticus (220, 100%)	Negative
P083	4	Female	Yes	Yes	Haemophilus influenzae (28644, 100%), Streptococcus pneumoniae (25011, 100%), Rhinovirus (245, 100%), Acinetobacter baumannii (23, 100%), Herpes simplex virus 1 (9, 100%), Human herpesvirus 7 (3, 100%)	Negative
P084	3	Female	No	Yes	Haemophilus influenzae (21202, 100%)	Negative
P085	< 1	Male	Yes	No	Streptococcus pneumoniae (31660, 100%), Human respiratory syncytial virus (22362, 100%), Haemophilus influenzae (14782, 100%), Human mastadenovirus (1543, 100%), Rhinovirus (869, 750%), Human herpesvirus 6 (3, 100%)	Negative
P086	6	Male	No	No	Human parainfluenza virus (11702, 100%), Haemophilus influenzae (6351, 100%), Enterovirus (4354, 100%), Moraxella catarrhalis (1031, 100%), Candida albicans (14, 100%)	Negative
P087	66	Male	Yes	Yes	Pseudomonas aeruginosa (5132, 100%), Herpes simplex virus 1 (15, 100%)	Negative
P088	3	Male	No	Yes	Streptococcus pneumoniae (32744, 100%), Rhinovirus (23634, 100%), Human mastadenovirus (215, 75%), Cytomegalovirus (126, 100%), Human herpesvirus 7 (7, 100%)	Acinetobacter baumannii
P089	< 1	Male	No	Yes	Streptococcus pneumoniae (24119, 100%), Streptococcus agalactiae (392, 100%), Pneumocystis jirovecii (222, 100%), Acinetobacter baumannii (144, 100%)	Negative
P090	< 1	Male	No	Yes	Streptococcus pneumoniae (35581, 100%), Human respiratory syncytial virus (33466, 100%), Moraxella catarrhalis (12403, 100%), Klebsiella pneumoniae (83, 100%)	Streptococcus pneumoniae, Klebsiella pneumoniae
P091	6	Male	Yes	Yes	Negative	Negative
P092	6	Male	Yes	Yes	Bordetella pertussis (2178, 100%), Streptococcus pneumoniae (89, 83.3%), Acinetobacter baumannii (87, 100%), Mycoplasma pneumoniae (42, 100%), Klebsiella pneumoniae (32, 80%), Human herpesvirus 6 (3, 100%)	Mycoplasma pneumoniae
P093	82	Male	Yes	Yes	Human mastadenovirus (77, 50%), Epstein-Barr virus (10, 100%), Cytomegalovirus (6, 66.7%)	Cytomegalovirus
P094	83	Male	Yes	Yes	Rhinovirus (18802, 100%), Klebsiella pneumoniae (6300, 100%), Herpes simplex virus 1 (2678, 100%), Enterococcus faecalis (1797, 100%), Candida albicans (271, 100%), Staphylococcus aureus (12, 100%)	Klebsiella pneumoniae
P095	70	Male	Yes	No	Negative	Negative
P096	75	Male	Yes	Yes	Acinetobacter baumannii (65846, 100%), Pseudomonas aeruginosa (18709, 100%), Stenotrophomonas maltophilia (5981, 100%)	Acinetobacter baumannii
P097	71	Female	Yes	Yes	Pneumocystis jirovecii (97, 100%), Staphylococcus aureus (11, 50%)	Negative
P098	50	Male	Yes	No	Klebsiella pneumoniae (250, 60%), Epstein-Barr virus (13, 100%)	Negative
P099	1	Female	No	Yes	Haemophilus influenzae (45044, 100%), Human respiratory syncytial virus (17368, 100%), Haemophilus haemolyticus (5005, 100%), Acinetobacter baumannii (3221, 100%), Enterobacter cloacae (33, 50%), Moraxella catarrhalis (29, 100%), Staphylococcus aureus (18, 100%), Serratia marcescens (17, 100%)	Negative
P100	< 1	Male	Yes	Yes	Human parainfluenza virus (23006, 100%), Moraxella catarrhalis (21748, 100%), Human respiratory syncytial virus (17598, 100%), Streptococcus pneumoniae (15903, 100%), Staphylococcus aureus (3675, 100%), Haemophilus haemolyticus (555, 100%), Candida albicans (92, 100%)	Human parainfluenza virus, Human respiratory syncytial virus
P101	6	Female	Yes	Yes	Mycoplasma pneumoniae (77683, 100%)	Mycoplasma pneumoniae
P102	73	Male	Yes	Yes	Pneumocystis jirovecii (413, 100%), Candida albicans (14, 100%)	Negative
P103	1	Female	No	Yes	Enterovirus (21287, 100%), Streptococcus pneumoniae (2908, 83.3%), Haemophilus haemolyticus (917, 100%), Candida albicans (313, 100%), Acinetobacter baumannii (162, 100%), Klebsiella pneumoniae (79, 80%), Cytomegalovirus (21, 100%)	Negative
P104	< 1	Male	No	Yes	Human respiratory syncytial virus (56382, 100%), Candida albicans (9650, 100%), Escherichia coli (478, 100%), Human herpesvirus 7 (71, 100%), Acinetobacter baumannii (43, 100%), Human herpesvirus 6 (21, 100%), Haemophilus haemolyticus (20, 100%), Streptococcus agalactiae (13, 100%), Pneumocystis jirovecii (13, 100%), Human coronavirusNL63 (9, 100%), EnterovirusA组 (8, 100%)	Human respiratory syncytial virus
P105	2	Male	No	Yes	Human mastadenovirus (65799, 100%), Rhinovirus (6276, 100%), Streptococcus pneumoniae (2561, 100%), Haemophilus influenzae (165, 100%), Staphylococcus aureus (77, 100%)	Negative
P106	22	Female	Yes	Yes	Tropheryma whipplei (10379, 100%), Pneumocystis jirovecii (191, 100%), Epstein-Barr virus (66, 100%), Staphylococcus aureus (28, 50%), Haemophilus haemolyticus (27, 100%)	Negative
P107	92	Male	Yes	Yes	Enterococcus faecalis (1085, 100%), Cytomegalovirus (12, 100%), Escherichia coli (12, 100%)	Escherichia coli
P108	40	Female	Yes	Yes	Staphylococcus aureus (25, 50%), Human herpesvirus 6 (3, 100%)	Negative
P109	< 1	Male	Yes	Yes	Human respiratory syncytial virus (27180, 100%), Haemophilus influenzae (10259, 100%), Mycoplasma pneumoniae(139, 100%), Rhinovirus (5, 100%)	Mycoplasma pneumoniae
P110	79	Male	Yes	Yes	Human herpesvirus 6 (49, 100%), Candida albicans (28, 100%), Epstein-Barr virus (5, 100%)	Acinetobacter baumannii, Candida albicans
P111	< 1	Female	No	Yes	Acinetobacter baumannii (52, 100%), Klebsiella pneumoniae (12,60%), Haemophilus haemolyticus (10, 66.7%), Cytomegalovirus (6, 100%)	Cytomegalovirus
P112	1	Male	Yes	Yes	Rhinovirus (56858, 100%), Moraxella catarrhalis (576, 100%), Staphylococcus aureus (275, 100%), Herpes simplex virus 1 (138, 100%), Mycoplasma pneumoniae (78, 100%), Cytomegalovirus (6, 66.7%), Human herpesvirus 6 (4, 100%), Human herpesvirus 7 (4, 100%)	Mycoplasma pneumoniae
P113	2	Male	Yes	Yes	Human bocavirus 1 (32084, 100%), Streptococcus pneumoniae (3415, 100%), Epstein-Barr virus (588, 100%), Rhinovirus (202, 100%), Human herpesvirus 7 (89, 100%), Haemophilus influenzae (39, 80%), Human mastadenovirus (17, 50%), Human herpesvirus 6 (16, 100%)	Negative
P114	< 1	Male	No	Yes	Cytomegalovirus (40235, 100%), Human metapneumovirus (17239, 50%), Streptococcus pneumoniae (8501, 100%), Moraxella catarrhalis (126, 100%), Rhinovirus (69, 100%)	Cytomegalovirus
P115	12	Male	Yes	No	Herpes simplex virus 1 (10181, 100%), Cytomegalovirus (361, 100%), Klebsiella pneumoniae (65, 50%), Epstein-Barr virus (41, 100%)	Negative
P116	2	Female	No	Yes	Human respiratory syncytial virus (49315, 100%), Moraxella catarrhalis (844, 100%), Haemophilus haemolyticus (265, 100%), Haemophilus influenzae (79, 80%), Staphylococcus aureus (25, 100%)	Cytomegalovirus
P117	3	Female	Yes	Yes	Streptococcus pneumoniae (24640, 100%), Human respiratory syncytial virus (21545, 100%), Human coronavirusOC43 (17891, 100%), Haemophilus influenzae (5638, 100%), Candida albicans (176, 100%), Human herpesvirus 7 (19, 100%)	Negative
P118	21	Female	Yes	No	Pneumocystis jirovecii (23455, 100%), Candida albicans (133, 100%), Human herpesvirus 7 (45, 100%)	Negative
P119	8	Female	Yes	No	Rhinovirus (45487, 100%), Human herpesvirus 7 (37, 100%)	Negative
P120	1	Female	No	Yes	Streptococcus pneumoniae (62390, 100%), Human parainfluenza virus (5742, 100%), Cytomegalovirus (17, 66.7%)	Negative
P121	< 1	Male	No	Yes	Moraxella catarrhalis (48041, 100%), Rhinovirus (15295, 100%), Cytomegalovirus (6772, 100%), Staphylococcus aureus (486, 100%), Haemophilus haemolyticus (21, 100%)	Negative
P122	3	Female	No	Yes	Streptococcus pneumoniae (19095, 100%), Moraxella catarrhalis (18087, 100%), Rhinovirus (14909, 66.7%), Human mastadenovirus (4773, 100%), Haemophilus haemolyticus (2158, 100%), Staphylococcus aureus (763, 100%), Haemophilus influenzae (228, 100%), Human herpesvirus 7 (28, 100%)	Negative
P123	4	Female	Yes	Yes	Rhinovirus (35195, 100%), Haemophilus influenzae (10341, 100%), Enterovirus (1988, 50%), Bacteroides fragilis (18, 100%)	Negative
P124	3	Male	Yes	Yes	Streptococcus pneumoniae (7356, 100%), Moraxella catarrhalis (850, 100%), Acinetobacter baumannii (226, 66.7%), Rhinovirus (141, 100%)	Negative
P125	1	Female	Yes	Yes	Human mastadenovirus (49499, 100%), Streptococcus pneumoniae (2923, 100%), Haemophilus influenzae (1042, 100%), Epstein-Barr virus (201, 100%), Human herpesvirus 7 (10, 100%)	Negative
P126	4	Male	Yes	Yes	Rhinovirus (42463, 100%), Streptococcus pyogenes (17119, 100%), Haemophilus haemolyticus (173, 100%), Haemophilus influenzae (51, 80%), Candida albicans (32, 100%), Epstein-Barr virus (6, 100%)	Negative
P127	2	Female	Yes	Yes	Human metapneumovirus (21670, 100%), Human coronavirusOC43 (1996, 100%), Rhinovirus (605, 100%), Candida albicans (599, 100%), Streptococcus pneumoniae (252, 50%), Human bocavirus 1 (221, 100%), Epstein-Barr virus (15, 100%)	Negative
P128	< 1	Male	No	Yes	Human respiratory syncytial virus (59842, 100%), Staphylococcus aureus (3229, 100%)	Negative
P129	60	Male	Yes	Yes	Candida albicans (3637, 100%)	Candida albicans
P130	< 1	Female	No	Yes	Human parainfluenza virus (58676, 100%)	Human parainfluenza virus
P131	< 1	Female	No	Yes	Staphylococcus aureus (12317, 50%), Rhinovirus (1033, 100%), Human herpesvirus 6 (18, 100%), Human bocavirus 1 (13, 100%), Measles morbillivirus (3, 100%)	Negative
P132	< 1	Male	No	Yes	Rhinovirus (24444, 100%), Moraxella catarrhalis (13816, 100%), Enterococcus faecalis (3076, 100%), Cytomegalovirus (303, 100%), Klebsiella aerogenes (120, 100%), Stenotrophomonas maltophilia (26, 75%), Acinetobacter baumannii (10, 100%), Ureaplasma parvum (10, 66.7%)	Negative
P133	56	Male	Yes	Yes	Klebsiella pneumoniae (54819, 100%), Aspergillus fumigatus (14348, 100%), Herpes simplex virus 1 (410, 100%), Rhizopus microsporus (357, 100%), Streptococcus agalactiae (12, 100%)	Negative
P134	72	Female	Yes	No	Klebsiella pneumoniae (51459, 100%), Acinetobacter baumannii (9726, 100%), Candida albicans (3716, 100%), Pseudomonas aeruginosa (1651, 100%), Epstein-Barr virus (118, 100%)	Klebsiella pneumoniae, Acinetobacter baumannii
P135	67	Male	Yes	No	Klebsiella pneumoniae (41880, 100%), Enterococcus faecium (40989, 100%), Cytomegalovirus (3305, 100%), Stenotrophomonas maltophilia (2450, 100%）	Klebsiella pneumoniae, Cytomegalovirus
P136	< 1	Male	Yes	Yes	Rhinovirus (55302, 100%), Klebsiella pneumoniae (187, 100%)	Negative
P137	< 1	Female	No	Yes	Human respiratory syncytial virus (64031, 100%), Staphylococcus aureus (3116, 100%), Rhinovirus (30, 100%)	Negative
P138	2	Male	No	Yes	Human mastadenovirus (68925, 100%), Streptococcus pneumoniae (4628, 100%), Haemophilus influenzae (784, 100%), Klebsiella pneumoniae (12, 80%), Human bocavirus 1 (7, 100%)	Mycoplasma pneumoniae
P139	4	Male	No	Yes	Human mastadenovirus (64638, 100%), Haemophilus influenzae (1218, 100%), Streptococcus pneumoniae (74, 50%), Rhinovirus (29, 100%), Human herpesvirus 7 (5, 100%)	Negative
P140	3	Male	No	Yes	Moraxella catarrhalis (11150, 100%), Rhinovirus (7173, 100%), Haemophilus haemolyticus (5204, 100%), Streptococcus pneumoniae (488, 100%), Human herpesvirus 6 (6, 100%)	Negative
P141	3	Male	No	Yes	Human coronavirusOC43 (43059, 100%), Streptococcus pneumoniae (3238, 100%), Human parainfluenza virus (2792, 100%), Moraxella catarrhalis (93, 100%), Staphylococcus aureus (64, 100%), Human herpesvirus 7 (31, 100%), Human herpesvirus 6 (7, 100%)	Negative
P142	1	Male	Yes	Yes	Streptococcus pneumoniae (46492, 100%), Cytomegalovirus (17810, 100%), Haemophilus haemolyticus (738, 100%)	Cytomegalovirus
P143	1	Male	No	Yes	Human bocavirus 1 (33259, 100%), Staphylococcus aureus (9578, 100%), Human parainfluenza virus (631, 100%), Haemophilus haemolyticus (488, 100%), Pneumocystis jirovecii (12, 100%)	Negative
P144	3	Female	No	Yes	Haemophilus influenzae (6264, 100%), Human bocavirus 1 (1767, 100%), Moraxella catarrhalis (452, 100%), Streptococcus pneumoniae (450, 100%), Rhinovirus (40, 100%)	Negative
P145	< 1	Male	No	Yes	Moraxella catarrhalis (24607, 100%), Streptococcus pneumoniae (8595, 100%), Rhinovirus (6463, 66.7%), Haemophilus haemolyticus (1245, 100%)	Negative
P146	2	Male	Yes	Yes	Haemophilus influenzae (46523, 100%), Moraxella catarrhalis (42220, 100%), Rhinovirus (49, 33.3%)	Negative
P147	2	Male	No	Yes	Human mastadenovirus (35502, 100%), Rhinovirus (22606, 100%)	Negative
P148	1	Male	Yes	Yes	Streptococcus pneumoniae (27243, 100%), Enterovirus (8099, 100%), Candida albicans (339, 100%), Haemophilus influenzae (264, 100%), Cytomegalovirus (37, 100%), Human herpesvirus 7 (19, 100%)	Negative
P149	5	Female	Yes	Yes	Rhinovirus (33764, 100%), Streptococcus pneumoniae (15316, 100%), Haemophilus haemolyticus (890, 100%), Staphylococcus aureus (759, 50%), Human respiratory syncytial virus (220, 100%), Human herpesvirus 7 (12, 100%)	Negative
P150	3	Female	No	Yes	Human parainfluenza virus (39911, 100%), Rhinovirus (2389, 100%), Haemophilus influenzae (222, 100%), Enterovirus (4, 50%), Human herpesvirus 6 (3, 100%)	Negative
P151	5	Male	No	Yes	Moraxella catarrhalis (55359, 100%), Haemophilus haemolyticus (1045, 100%), Streptococcus pneumoniae (870, 100%), Bordetella pertussis (63, 100%), Human herpesvirus 7 (17, 100%), Epstein-Barr virus (4, 100%)	Negative
P152	5	Female	Yes	Yes	Human respiratory syncytial virus (44530, 100%), Streptococcus pneumoniae (10456, 100%), Haemophilus influenzae (734, 80%), Cytomegalovirus (652, 100%), Moraxella catarrhalis (138, 100%), Rhinovirus (17, 50%), Human herpesvirus 7 (15, 100%), Human herpesvirus 6 (3, 100%)	Negative
P153	3	Male	No	Yes	Human parainfluenza virus (1871, 50%), Human mastadenovirus (1553, 75%), Haemophilus influenzae (1346, 100%), Moraxella catarrhalis (567, 100%), Rhinovirus (123, 66.7%)	Negative
P154	< 1	Female	Yes	Yes	Moraxella catarrhalis (46982, 100%), Human respiratory syncytial virus (30689, 100%), Rhinovirus (1511, 100%), Klebsiella pneumoniae (941, 100%), Escherichia coli (151, 100%), Enterobacter cloacae (69, 50%)	Negative
P155	59	Male	Yes	Yes	Enterococcus faecalis (44022, 100%), Candida albicans (9118, 100%), Epstein-Barr virus (1287, 100%), Human herpesvirus 7 (19, 100%), Stenotrophomonas maltophilia (17, 50%), Human herpesvirus 6 (7, 100%)	Negative
P156	< 1	Male	Yes	Yes	Rhinovirus (27501, 100%), Moraxella catarrhalis (21973, 100%), Streptococcus pneumoniae (9696, 100%), Haemophilus haemolyticus (2081, 100%), Acinetobacter baumannii (21, 100%）	Negative
P157	< 1	Male	No	Yes	Moraxella catarrhalis (36236, 100%), Haemophilus influenzae (33680, 80%), Cytomegalovirus (8232, 66.7%), Staphylococcus aureus (668, 100%), Human coronavirusOC43 (140, 100%), Rhinovirus (3, 100%）	Haemophilus influenzae
P158	3	Male	Yes	Yes	Streptococcus pneumoniae (9105, 100%), Epstein-Barr virus (582, 100%), Human herpesvirus 7 (33, 100%)	Negative
P159	67	Male	Yes	Yes	Pseudomonas aeruginosa (51553, 100%), Stenotrophomonas maltophilia (6022, 100%), Epstein-Barr virus (572, 100%), Herpes simplex virus 1 (19, 100%）	Pseudomonas aeruginosa
P160	2	Male	Yes	Yes	Moraxella catarrhalis (28301, 100%), Haemophilus influenzae (14379, 100%), Human parainfluenza virus (13276, 100%), Staphylococcus aureus (1341, 100%), Streptococcus agalactiae (48, 100%）	Negative
P161	5	Male	Yes	Yes	Rhinovirus (20293, 100%), Haemophilus haemolyticus (760, 100%), Staphylococcus aureus (82, 100%)	Negative
P162	55	Female	Yes	No	Pseudomonas aeruginosa (41905, 100%), Cytomegalovirus (6, 100%)	Klebsiella pneumoniae, Pseudomonas aeruginosa
P163	5	Male	No	Yes	Moraxella catarrhalis (28835, 100%), Rhinovirus (13664, 100%), Haemophilus haemolyticus (1517, 100%), Streptococcus pneumoniae (940, 100%), Haemophilus influenzae (282, 100%), Streptococcus agalactiae (22, 100%）	Negative
P164	4	Female	Yes	No	Streptococcus pneumoniae (7839, 100%), Moraxella catarrhalis (7569, 100%), Enterococcus faecalis (2773, 100%), Candida albicans (2542, 100%), Rhinovirus (2515, 100%), Haemophilus influenzae (1997, 100%), Acinetobacter baumannii (1940, 100%), Human mastadenovirus (725, 100%), Human herpesvirus 7 (411, 100%), Haemophilus haemolyticus (273, 100%), Staphylococcus aureus (98, 100%), Klebsiella pneumon…	Negative
P165	2	Female	No	No	Human respiratory syncytial virus (20496, 100%), Rhinovirus (1455, 33.3%), Cytomegalovirus (69, 100%), Human herpesvirus 7 (15, 100%）	Negative
P166	< 1	Male	No	Yes	Streptococcus pneumoniae (32065, 100%), Rhinovirus (5253, 33.3%), Staphylococcus aureus (3052, 100%), Moraxella catarrhalis (411, 100%), Haemophilus haemolyticus (29, 100%)	Negative
P167	< 1	Female	Yes	Yes	Human respiratory syncytial virus (67339, 100%), Staphylococcus aureus (5057, 50%), Candida albicans (1488, 100%), Acinetobacter baumannii (387, 100%), Escherichia coli (127, 100%）	Escherichia coli, Human respiratory syncytial virus
P168	2	Male	Yes	Yes	Rhinovirus (25629, 33.3%), Streptococcus pneumoniae (21672, 100%), Staphylococcus aureus (108, 100%), Cytomegalovirus (14, 100%）	Negative
P169	1	Male	Yes	Yes	Human bocavirus 1 (29902, 100%), Haemophilus haemolyticus (347, 100%), Cytomegalovirus (15, 66.7%), Rhinovirus (6, 66.7%)	Negative
P170	1	Female	No	Yes	Human respiratory syncytial virus (34323, 100%), Moraxella catarrhalis (13177, 100%), Rhinovirus (3549, 100%), Haemophilus haemolyticus (1065, 100%）	Negative
P171	1	Female	Yes	Yes	Human parainfluenza virus (35312, 100%), Haemophilus influenzae (703, 100%), Haemophilus haemolyticus (287, 100%)	Negative
P172	< 1	Male	No	Yes	Moraxella catarrhalis (25081, 100%), Cytomegalovirus (21972, 100%), Rhinovirus (17208, 100%), Streptococcus pneumoniae (8650, 100%), Haemophilus haemolyticus (115, 100%), Enterovirus (114, 100%), Candida albicans (10, 100%）	Negative
P173	72	Male	No	Yes	Acinetobacter baumannii (76177, 100%), Pseudomonas aeruginosa (6032, 100%), Stenotrophomonas maltophilia (462, 75%), Klebsiella pneumoniae (137, 100%), Cytomegalovirus (134, 100%）	Negative
P174	< 1	Male	No	Yes	Human coronavirusOC43 (24598, 100%), Cytomegalovirus (21785, 100%), Rhinovirus (12375, 100%), Staphylococcus aureus (2446, 50%), Escherichia coli (101, 50%）	Cytomegalovirus
P175	5	Male	No	Yes	Streptococcus pneumoniae (6052, 100%), Haemophilus haemolyticus (5196, 100%), Human parainfluenza virus (1925, 100%), Haemophilus influenzae (278, 80%), Human herpesvirus 7 (55, 100%), Rhinovirus (48, 100%), Streptococcus pyogenes (34, 100%), Herpes simplex virus 1 (26, 100%), Human herpesvirus 6 (4, 100%)	Negative
P176	5	Male	Yes	Yes	Human respiratory syncytial virus (47705, 100%), Staphylococcus aureus (1874, 100%), Haemophilus haemolyticus (59, 100%), Human herpesvirus 7 (44, 100%), Epstein-Barr virus (14, 100%), Human herpesvirus 6 (3, 50%）	Human respiratory syncytial virus
P177	1	Male	No	Yes	Streptococcus pneumoniae (51562, 100%), Human respiratory syncytial virus (19155, 100%)	Negative
P178	1	Male	No	Yes	Mycoplasma pneumoniae (28248, 100%), Streptococcus pneumoniae (16851, 100%), Human bocavirus 1 (10841, 100%), Moraxella catarrhalis (9802, 100%), Human respiratory syncytial virus (6884, 100%), Staphylococcus aureus (165, 100%), Candida albicans (101, 100%), Rhinovirus (27, 33.3%)	Mycoplasma pneumoniae
P179	54	Male	Yes	No	Staphylococcus aureus (30382, 100%), Candida albicans (12137, 100%), Enterococcus faecalis (11063, 100%), Epstein-Barr virus (825, 100%), Herpes simplex virus 1 (30, 100%), Klebsiella pneumoniae (30, 80%)	Klebsiella pneumoniae
P180	32	Male	Yes	No	Haemophilus influenzae (503, 100%)	Klebsiella pneumoniae, Haemophilus influenzae
P181	1	Male	Yes	Yes	Moraxella catarrhalis (29838, 100%), Human bocavirus 1 (27123, 100%), Streptococcus pneumoniae (7401, 100%), Cytomegalovirus (644, 100%）	Negative
P182	4	Male	Yes	Yes	Streptococcus pneumoniae (36696, 100%), Human parainfluenza virus (234, 50%), Rhinovirus (223, 66.7%), Klebsiella pneumoniae (76, 100%), Haemophilus influenzae (47, 100%), Human mastadenovirus (27, 50%), Epstein-Barr virus (25, 100%), Staphylococcus aureus (20, 100%), Acinetobacter baumannii (20, 100%）	Negative
P183	56	Male	No	Yes	Pseudomonas aeruginosa (2338, 100%）	Pseudomonas aeruginosa
P184	6	Male	No	Yes	Streptococcus pneumoniae (4445, 100%), Rhinovirus (605, 33.3%), Staphylococcus aureus (422, 100%), Streptococcus pyogenes (151, 100%), Haemophilus influenzae (104, 100%), Human herpesvirus 7 (45, 100%), Human herpesvirus 6 (8, 100%), Human parainfluenza virus (6, 100%)	Negative
P185	10	Female	No	Yes	Mycoplasma pneumoniae (67972, 100%）	Negative
P186	49	Male	No	No	Candida albicans (13305, 100%), Klebsiella pneumoniae (4310, 100%), Haemophilus influenzae (96, 100%), Epstein-Barr virus (20, 100%)	Negative
P187	4	Female	No	Yes	Streptococcus pneumoniae (21188, 100%), Rhinovirus (13066, 33.3%), Haemophilus influenzae (9865, 100%), Moraxella catarrhalis (1452, 100%), Haemophilus haemolyticus (1219, 100%), Human herpesvirus 7 (27, 100%), Human herpesvirus 6 (4, 100%)	Negative
P188	< 1	Male	No	Yes	Human bocavirus 1 (35647, 100%), Cytomegalovirus (13822, 100%), Rhinovirus (11338, 100%), Staphylococcus aureus (2728, 50%), Klebsiella pneumoniae (597, 100%)	Negative
P189	2	Female	No	No	Human coronavirusOC43 (33398, 100%), Acinetobacter baumannii (7507, 100%), Haemophilus haemolyticus (951, 100%), Rhinovirus (465, 66.7%), Staphylococcus aureus (247, 100%), Epstein-Barr virus (151, 100%), Klebsiella pneumoniae (41, 100%)	Negative
P190	3	Male	Yes	Yes	Streptococcus pneumoniae (23359, 100%), Moraxella catarrhalis (23356, 100%), Human coronavirusOC43 (20790, 100%), Rhinovirus (8663, 100%), Haemophilus influenzae (2019, 100%), Haemophilus haemolyticus (556, 100%), Staphylococcus aureus (292, 100%), Human coronavirusHKU1 (28, 100%)	Negative
P191	8	Female	Yes	Yes	Moraxella catarrhalis (5105, 100%), Human bocavirus 1 (4168, 100%), Streptococcus pneumoniae (4005, 100%), Mycoplasma pneumoniae (1334, 100%), Human coronavirusHKU1 (559, 100%), Candida albicans (399, 100%), Cytomegalovirus (50, 66.7%), Human mastadenovirus (19, 100%)	Mycoplasma pneumoniae
P192	4	Male	No	Yes	Haemophilus influenzae (26762, 100%), Streptococcus pneumoniae (20190, 100%), Moraxella catarrhalis (5566, 100%), Human parainfluenza virus (1370, 50%), Human bocavirus 1 (78, 100%), Human mastadenovirus (11, 75%), Human herpesvirus 7 (9, 100%)	Negative
P193	3	Male	Yes	Yes	Streptococcus pneumoniae (40606, 100%), Rhinovirus (14841, 100%), Haemophilus haemolyticus (148, 100%), Epstein-Barr virus (68, 100%)	Streptococcus pneumoniae
P194	1	Female	Yes	Yes	Haemophilus influenzae (42357, 100%), Human bocavirus 1 (34212, 100%), Streptococcus pneumoniae (1526, 100%), Moraxella catarrhalis (18, 50%), Human mastadenovirus (11, 50%)	Negative
P195	< 1	Male	Yes	Yes	Human respiratory syncytial virus (26629, 100%), Streptococcus pneumoniae (24936, 100%), Moraxella catarrhalis (22228, 100%), Rhinovirus (12624, 100%), Human coronavirusOC43 (220, 100%), Staphylococcus aureus (31, 100%)	Streptococcus pneumoniae, Human respiratory syncytial virus
P196	1	Male	No	Yes	Staphylococcus aureus (1134, 100%), Haemophilus haemolyticus (441, 100%)	Negative
P197	3	Female	Yes	Yes	Chlamydia trachomatis (19291, 100%), Haemophilus influenzae (19120, 100%), Moraxella catarrhalis (11464, 100%), Rhinovirus (4451, 100%), Streptococcus pneumoniae (322, 100%), Human metapneumovirus (73, 50%), Epstein-Barr virus (43, 100%), Cytomegalovirus (9, 100%)	Negative
P198	3	Male	Yes	Yes	Streptococcus pneumoniae (27389, 100%), Rhinovirus (22236, 100%), Cytomegalovirus (4, 66.7%)	Negative
P199	3	Male	Yes	Yes	Haemophilus influenzae (50735, 100%), Human respiratory syncytial virus (7236, 100%), Rhinovirus (3076, 100%), Moraxella catarrhalis (25, 100%), Human coronavirusOC43 (19, 100%), Staphylococcus aureus (12, 100%)	Negative
P200	3	Male	No	Yes	Human bocavirus 1 (23560, 100%), Staphylococcus aureus (16160, 100%), Rhinovirus (3963, 33.3%), Human parainfluenza virus (620, 50%), Haemophilus haemolyticus (279, 100%), Cytomegalovirus (10, 100%)	Negative
P201	4	Male	Yes	Yes	Human respiratory syncytial virus (48935, 100%), Moraxella catarrhalis (3955, 100%), Haemophilus influenzae (3623, 100%), Streptococcus pneumoniae (149, 66.7%), Human herpesvirus 7 (6, 100%)	Negative
P202	4	Male	Yes	Yes	Human mastadenovirus (49627, 100%), Staphylococcus aureus (74, 100%), Haemophilus influenzae (34, 100%)	Negative
P203	< 1	Male	No	Yes	Moraxella catarrhalis (35855, 100%), Streptococcus pneumoniae (30927, 100%), Human respiratory syncytial virus (6749, 100%), Human coronavirusNL63 (3181, 100%), Haemophilus haemolyticus (141, 100%), Human mastadenovirus (97, 100%), Staphylococcus aureus (65, 100%)	Negative
P204	6	Male	No	Yes	Haemophilus haemolyticus (1349, 100%), Haemophilus influenzae (438, 100%), Streptococcus pneumoniae (239, 83.3%), Epstein-Barr virus (14, 100%), Human herpesvirus 6 (7, 100%)	Negative
P205	< 1	Male	No	Yes	Human respiratory syncytial virus (31200, 100%), Rhinovirus (21374, 100%), Candida albicans (4165, 100%), Streptococcus pneumoniae (2286, 100%), Serratia marcescens (23, 50%), Enterobacter cloacae (20, 50%), Escherichia coli (16, 100%), Acinetobacter baumannii (16, 66.7%), Ureaplasma parvum (16, 66.7%)	Negative
P206	2	Male	Yes	Yes	Human coronavirusOC43 (22561, 100%), Rhinovirus (10644, 100%), Staphylococcus aureus (1577, 100%), Moraxella catarrhalis (182, 50%), Acinetobacter baumannii (91, 100%), Cytomegalovirus (9, 66.7%)	Negative
P207	4	Female	No	Yes	Human mastadenovirus (46951, 100%), Human parainfluenza virus (5417, 100%), Haemophilus influenzae (426, 100%), Streptococcus pneumoniae (292, 66.7%), Acinetobacter baumannii (191, 100%)	Negative
P208	7	Female	No	Yes	Mycoplasma pneumoniae (43173, 100%), Staphylococcus aureus (30, 100%), Haemophilus influenzae (14, 80%)	Mycoplasma pneumoniae
P209	1	Male	Yes	Yes	Rhinovirus (26154, 100%), Human respiratory syncytial virus (2446, 100%), Acinetobacter baumannii (2247, 100%), Cytomegalovirus (738, 100%)	Enterobacter cloacae
